# Supplementary material
Source: Research Square preprint supplement (doi:10.21203/rs.3.rs-9051053/v1)
Supplement: Supplementary file 1 [file 53a94d3db1ebeccccb253ede.docx]

**Ethical Perspectives in Psychiatry: A Global Survey**

*In the complex field of psychiatry, ethics holds crucial importance. General ethical principles must be adapted to the specific nature of psychiatric care, where patients may struggle to make autonomous decisions due to their illness. Psychiatrists are thus faced with unique challenges, such as respecting patient autonomy, preserving confidentiality, obtaining informed consent, and ensuring effective communication within the therapeutic relationship.*

*It is essential to recognize that ethical standards vary from one country to another due to cultural, legal, and social differences.*

*Therefore, the objective of this study is to explore the ethical perspectives of psychiatrists from different regions of the world on various topics: involuntary hospitalization, involuntary treatment, consent to care, autonomy, medical confidentiality, the disclosure of diagnosis, assisted suicide and euthanasia, substitution treatment, as well as neurodevelopmental disorders and gender dysphoria.*

*Filling this questionnaire takes around 15 mins and this research aims to better understand the ethical challenges faced by psychiatric professionals on a global scale. Note that your answers will remain confidential, and that the data collected will be used solely for research purposes.*

1. Involuntary hospitalizations:
   1. To what extent would you be in favor of applying compulsory treatment in all cases where the law allows it?

A. Strongly favorable

B. Somewhat favorable

C. Neutral

D. Somewhat opposed

E. Strongly opposed

- 1. What would be your concerns regarding the use of involuntary hospitalizations in psychiatry? (Multiple answers can be selected)

A. Violation of patient rights

B. Increased risk of stigmatization

C. Risk of misuse or abuse of power by medical authorities

D. Compromise of the therapeutic alliance

E. Confusion between treatment and confinement

F. Other (please specify)

- 1. What are the reasons that justify involuntary hospitalizations in your country?
     1. Risk to self or others (please specify)
     2. Severe mental health crises (please specify)
  2. In your country, what are your suggestions for improving practices and policies related to involuntary hospitalizations in psychiatry?

1. Compulsory treatments (isolation, restraints)
   1. To what extent do you think isolation is effective in managing aggressive or dangerous behaviors in psychiatric patients?’

A. Very effective

B. Moderately effective

C. Neutral

D. Not very effective

E. Not effective at all

- 1. In your opinion, what are the main criteria that should guide the decision to use isolation or restraints in psychiatry? (multiple answers can be selected)

A. risk to self or others (please specify)

B. least restrictive option (please specify)

C. previous treatment history (please specify)

- 1. How do you think isolation and restraint protocols could be improved to minimize negative effects on patients in agitated situations? (multiple answers can be selected)

A. Intensive training of healthcare staff in crisis management and de-escalation techniques.

B. Development of standardized protocols for appropriate and safe use of isolation and restraints

C. Use of non-invasive monitoring technologies to detect and prevent agitation situations before they require coercive measures.

D. Systematic assessment of triggering factors and patient history for an individualized and preventive approach.

E. Regular review of protocols in collaboration with patients and families to ensure their relevance and acceptability.

F. Other (please specify)

1. Consent to Treatment:
   1. When making medical decisions, how important do you consider the informed consent of the patient?

A. I believe that providing thorough information to the patient is essential to ensure informed consent.

B. I ensure that the patient fully understands the information provided before making any medical decisions.

C. I believe it is crucial to respect the patient's consent in all circumstances.

D. I do not always prioritize the patient's consent, sometimes favoring medical decisions based on my expertise.

E. Other (please specify)

1. Autonomy:

*Psychic autonomy, in this context, implies an individual's ability to judge, anticipate, and reason while maintaining their freedom of choice: the ability to accept or refuse what is presented to them. When a person's mental faculties are impaired, the question of their consent to treatment becomes particularly relevant.*

- 1. Respecting the autonomy of a patient with impaired judgment is:

A. Always a top and absolute priority.

B. Negotiable depending on the case.

C. Neutral

D. Something not to be considered.

- 1. In your opinion, what are the necessary conditions to enable a patient to make autonomous decisions? (multiple answers can be selected)

A. Clear understanding of the treatment options

B. Adequate support from healthcare professionals

C. Access to relevant information and resources

D. Stable mental and emotional state

E. Other (please specify): ____________

1. Medical confidentiality:
   1. How important is medical confidentiality in psychiatric practice?

A. Essential

B. Very important

C. Not very important

D. Not important at all

- 1. Are you in favor of breaking medical confidentiality in cases of imminent danger to the patient or others? (confirmed suicidal ideation, assured aggressiveness towards others)

A. Yes, always

B. Yes, in most cases

C. Depends on the situation

D. No, except in exceptional cases

E. No, never

- 1. What are your main concerns regarding the breaking of medical confidentiality in psychiatry? (multiple answers can be selected)

A. Risk of breaking the patient-doctor trust

B. Risk of increased stigmatization for psychiatric patients

C. Risk of harm to the patient due to disclosure of sensitive information

D. Risk of legal proceedings

E. Loss of intrinsic value of the physician and medicine

F. Other (please specify)

- 1. In what situations does the law in your country allow you to break medical confidentiality?

1. Announcement of the diagnosis:
   1. To what extent are you in favor of clearly naming the diagnosis of a serious or chronic illness (bipolar disorder, ASD, schizophrenia) to the patient during psychiatric consultations in your country?

A. Strongly favorable: you say it all the time

B. Somewhat favorable: in some cases

C. Somewhat opposed: don't say it often

D. Strongly opposed: never say it

- 1. What are your main ethical concerns regarding clear communication of the diagnosis in psychiatry?

A. Risk of reinforcing stereotypes or stigma associated with the diagnosis.

B. Fear of upsetting the patient (Risk of causing anxiety or distress to the patient)

C. Concern that the patient may not understand.

D. Lack of interest in doing so

E. Other (please specify)

1. Assisted suicide and euthanasia :

*In the field of psychiatry, assisted suicide refers to intentional assistance provided to a person suffering from severe and persistent mental disorders to end their own life. Euthanasia for psychological suffering, on the other hand, involves the deliberate act of a third party, often a mental health professional, to administer a lethal substance to a psychiatric patient facing a severe and incurable mental illness, either at their request or with their prior consent.*

- 1. In your country, is assisted suicide legalized for patients suffering from a mental illness?
     1. Yes
     2. No
  2. Is euthanasia legalized for mentally ill patients in your country?
     1. Yes
     2. No
  3. To what extent are you in favor of legalizing assisted suicide for mentally ill patients with refractory suffering and chronic mental illness in your country?

A. Strongly favorable

B. Somewhat favorable

C. Somewhat opposed

D. Strongly opposed

- 1. To what extent are you in favor of legalizing euthanasia for mentally ill patients with refractory suffering and chronic mental illness in your country?

A. Strongly favorable

B. Somewhat favorable

C. Somewhat opposed

D. Strongly opposed

- 1. Under what circumstances do you think assisted suicide could be justified? (multiple answers can be selected)

A. To respect the autonomy and freedom of choice of the patient at the end of life.

B. To allow patients to end unbearable suffering with dignity.

C. To prevent people from committing suicide alone and without support.

D. When patients believe their life has no more value and wish to end it with assistance.

- 1. To what extent do you support euthanasia in the psychiatric context? (multiple answers can be selected)

A. I believe euthanasia is justified in respecting the autonomy and freedom of choice of the patient.

B. I support euthanasia mainly to alleviate the unbearable suffering of terminally ill patients.

C. I believe euthanasia can be a necessary option to prevent inevitable suicides in patients suffering from incurable diseases.

D. I am in favor of euthanasia when life is no longer worth living, according to the patient's judgment.

1. Substitution Treatment and New Drugs (Psychedelics):
   1. What ethical risks does the use of substitution treatments for addictions pose in your country? (multiple answers can be selected)

A. Risk of dependence on the substitution treatment itself

B. Risk of substituting one addiction for another

C. Risk of stigmatization of patients receiving substitution treatment

D. Risk of reducing motivation to stop substance use.

E. Other (please specify)

- 1. As a psychiatrist, how do you perceive the ethical use of psychedelics in the treatment of mental disorders, considering emerging research and associated ethical challenges?

A. I believe psychedelics offer a promising therapeutic potential and are a valid option in certain circumstances, provided there is adequate supervision.

B. I am cautious about the use of psychedelics, preferring an approach based on solid evidence and a thorough individual assessment of risks and benefits.

C. I have reservations about the use of psychedelics due to ethical concerns and uncertainties about their long-term safety.

D. I am reluctant to prescribe psychedelics due to the risks to patients' mental health and the lack of sufficient data on their effectiveness and safety.

1. Neurodevelopmental disorders
   1. How do you reconcile ethical principles when treating individuals with severe neurodevelopmental disorders?

A. By emphasizing respect for autonomy and dignity of each individual, even in the presence of severe disabilities.

B. By prioritizing the search for solutions aimed at improving quality of life and reducing suffering, despite the challenges faced.

C. By considering necessary interventions to ensure the safety and well-being of patients, even if it involves restrictions on freedom.

D. By promoting an inclusive approach that recognizes the intrinsic value of every individual, regardless of their abilities.

1. Gender dysphoria:
   1. Regarding the management of gender dysphoria in mental health services in your country, it is:

A. Very high priority

B. Somewhat high priority

C. Somewhat low priority

D. Not a priority at all

- 1. Are you in favor of recognizing and affirming the gender identity chosen by the patient as part of their psychiatric treatment?

A. Yes, always

B. Yes, in most cases

C. No, except in exceptional cases

D. No, never

- 1. What are your main concerns regarding the management of gender dysphoria in psychiatry? (multiple answers can be selected)

A. Specific age for treatments (hormone therapy, surgery, etc.)

B. Waiting time to confirm the choice

C. Seeking multidisciplinary opinions and care

D. Access to appropriate medical care

E. Stigmatization and discrimination

F. Risks associated with hormonal or surgical treatments

G. Balance between patient autonomy and medical guidelines

H. Other (please specify)
